# Supplementary material for: Lack of Epileptogenic Effects of the Creatine Precursor Guanidinoacetic Acid on Neuronal Cultures In Vitro
Source: MDPI journal article supplement (doi:10.3390/biom13010074), 2022-12-30
Supplement: s1 [file s1]

SUPPLEMENTAL TABLE 2: Mean burst duration (BD) of single networks - Measurement unit: mSec

NEOCORTICAL NETWORKS

| Internal code number of network | Concentration of guanidinoacetic acid (GAA) |           |            |             |
|---------------------------------|---------------------------------------------|-----------|------------|-------------|
|                                 | Baseline                                    | 1 $\mu$ M | 10 $\mu$ M | 100 $\mu$ M |
| 15345                           | 193,64                                      | 147,59    | 177        | 49,55       |
| 18331                           | 150,61                                      | 143,67    | 131,64     | 114,52      |
| 18332                           | 153,65                                      | 151,56    | 132,01     | 128,32      |
| 19216                           | 142,31                                      | 126,35    | 133,4      | 135,85      |
| 20551                           | 110,15                                      | 99,94     | 93,1       | 55,38       |
| 20559                           | 202,01                                      | 220,43    | 228,57     | 11          |
| 22643                           | 345,33                                      | 93,39     | 151,46     | 0           |
| 20554                           | 153,72                                      | 203,74    | 207,85     | 0           |

HIPPOCAMPAL NETWORKS

| Internal code number of network | Concentration of guanidinoacetic acid (GAA) |           |            |             |
|---------------------------------|---------------------------------------------|-----------|------------|-------------|
|                                 | Baseline                                    | 1 $\mu$ M | 10 $\mu$ M | 100 $\mu$ M |
| 24250                           | 81,31                                       | 64,48     | 22,95      | 0           |
| 20554                           | 96,66                                       | 103,94    | 45,98      | 20,92       |
| 20512                           | 235,68                                      | 146,4     | 108,13     | 42,67       |
| 18333                           | 112,49                                      | 107,47    | 38,17      | 79,71       |
| 18332                           | 162,97                                      | 138,66    | 126,47     | 135,5       |
| 18331                           | 236,94                                      | 254,15    | 169,2      | 140,85      |
| 15345                           | 136,69                                      | 82,65     | 62,04      | 0           |
