# Supplementary material for: Lack of Epileptogenic Effects of the Creatine Precursor Guanidinoacetic Acid on Neuronal Cultures In Vitro
Source: MDPI journal article supplement (doi:10.3390/biom13010074), 2022-12-30
Supplement: s1 [file s1]

SUPPLEMENTAL TABLE 6 - EFFECTS OF 10 $\mu$ M GUANIDINOACETIC ACID (GAA) ON NUMBER AND LATENCY OF STIMULUS-EVOKED SPIKES (PAIRED DATA)

Number of stimulus-evoked spikes within 400 mSec from electrical stimulus

| Pre GAA | Post GAA |
|---------|----------|
| 1,55    | 1,54     |
| 2,6     | 2,3      |
| 2,63    | 2,45     |
| 1,89    | 1,89     |
| 3,76    | 2,65     |

Latency of stimulus-evoked spike (milliseconds)

| Pre GAA | Post GAA |
|---------|----------|
| 276,6   | 257,46   |
| 197,61  | 245,79   |
| 227,07  | 226,11   |
| 279,66  | 334,35   |
| 223,82  | 157,14   |
