# Supplementary material for: Lack of Epileptogenic Effects of the Creatine Precursor Guanidinoacetic Acid on Neuronal Cultures In Vitro
Source: MDPI journal article supplement (doi:10.3390/biom13010074), 2022-12-30
Supplement: s1 [file s1]

SUPPLEMENTAL TABLE 1: Mean firing rate (MFR) of single networks - Measurement unit: spikes/sec

NEOCORTICAL NETWORKS

Internal code number of Concentration of guanidinoacetic acid (GAA)

| network | Baseline | 1 $\mu$ M | 10 $\mu$ M | 100 $\mu$ M |
|---------|----------|-----------|------------|-------------|
| 15345   | 2,53     | 1,5       | 1,6        | 0,18        |
| 18331   | 5,99     | 6,05      | 5,5        | 2,9         |
| 18332   | 3,46     | 3         | 2,95       | 1,66        |
| 19216   | 1,1      | 1,24      | 0,69       | 0,48        |
| 20551   | 0,64     | 0,55      | 0,48       | 0,11        |
| 20559   | 3,67     | 2,89      | 1,05       | 0,17        |
| 22643   | 0,78     | 0,33      | 0,42       | 0,11        |
| 20554   | 1        | 0,8       | 0,29       | 0           |

HIPPOCAMPAL NETWORKS

Internal code number of Concentration of guanidinoacetic acid (GAA)

| network | Baseline | 1 $\mu$ M | 10 $\mu$ M | 100 $\mu$ M |
|---------|----------|-----------|------------|-------------|
| 24250   | 1,52     | 1,08      | 0,06       | 0           |
| 20554   | 2,9      | 2,52      | 1,48       | 0,2         |
| 20512   | 12,32    | 14,86     | 9,58       | 2,38        |
| 18333   | 4,88     | 6,03      | 0,81       | 2,04        |
| 18332   | 2,12     | 2,06      | 2,16       | 1,27        |
| 18331   | 7,85     | 8,59      | 8,84       | 6,36        |
| 15345   | 8,04     | 4,18      | 0,73       | 0           |
