# Supplementary material for: Lack of Epileptogenic Effects of the Creatine Precursor Guanidinoacetic Acid on Neuronal Cultures In Vitro
Source: MDPI journal article supplement (doi:10.3390/biom13010074), 2022-12-30
Supplement: s1 [file s1]

SUPPLEMENTAL TABLE 4: Mean frequency intra burst (MFIB) of single networks - Measurement unit: spikes/mSec

#### NEOCORTICAL NETWORKS

| Internal code number of network | Concentration of guanidinoacetic acid (GAA) |           |            |             |
|---------------------------------|---------------------------------------------|-----------|------------|-------------|
|                                 | Baseline                                    | 1 $\mu$ M | 10 $\mu$ M | 100 $\mu$ M |
| 15345                           | 0,15                                        | 0,15      | 0,17       | 0,04        |
| 18331                           | 0,19                                        | 0,21      | 0,22       | 0,21        |
| 18332                           | 0,19                                        | 0,2       | 0,21       | 0,19        |
| 19216                           | 0,13                                        | 0,13      | 0,11       | 0,09        |
| 20551                           | 0,16                                        | 0,12      | 0,14       | 0,08        |
| 20559                           | 0,12                                        | 0,11      | 0,11       | 0           |
| 22643                           | 0,1                                         | 0,01      | 0,01       | 0           |
| 20554                           | 0,16                                        | 0,17      | 0,14       | 0           |

#### HIPPOCAMPAL NETWORKS

| Internal code number of network | Concentration of guanidinoacetic acid (GAA) |           |            |             |
|---------------------------------|---------------------------------------------|-----------|------------|-------------|
|                                 | Baseline                                    | 1 $\mu$ M | 10 $\mu$ M | 100 $\mu$ M |
| 24250                           | 0,11                                        | 0,1       | 0,03       | 0           |
| 20554                           | 0,12                                        | 0,11      | 0,07       | 0,01        |
| 20512                           | 0,1                                         | 0,13      | 0,14       | 0,11        |
| 18333                           | 0,13                                        | 0,15      | 0,04       | 0,08        |
| 18332                           | 0,08                                        | 0,09      | 0,1        | 0,09        |
| 18331                           | 0,1                                         | 0,1       | 0,12       | 0,12        |
| 15345                           | 0,12                                        | 0,11      | 0,07       | 0           |
