# Supplementary material for: Lack of Epileptogenic Effects of the Creatine Precursor Guanidinoacetic Acid on Neuronal Cultures In Vitro
Source: MDPI journal article supplement (doi:10.3390/biom13010074), 2022-12-30
Supplement: s1 [file s1]

SUPPLEMENTAL TABLE 5 - EFFECTS OF DAYS IN VITRO AND OF GUANIDINOACETIC ACID ON VARIOUS ELECTROPHYSIOLOGICAL PARAMETERS

| Controls - no guanidinoacetic acid added |    |            |                  |         |                 |
|------------------------------------------|----|------------|------------------|---------|-----------------|
| Internal code of network - DIV           | EL | MFR (sp/s) | MBR (burst /min) | BD (ms) | MFIB (spike/ms) |
| 14986 - DIV 11                           | 46 | 2,46       | 5,12             | 333,27  | 0,04            |
| 18882 - DIV 11                           | 26 | 2,96       | 6,28             | 298,37  | 0,06            |
| 34340 - DIV 11                           | 40 | 4,21       | 11,84            | 317,15  | 0,04            |
| 34341 - DIV 11                           | 46 | 2,3        | 5,64             | 289,64  | 0,04            |
| 38925 - DIV 11                           | 48 | 3,36       | 11,6             | 301,57  | 0,04            |

[illegible]

**Abbreviations:** DIV=Days in vitro; EL: Number of active electrodes in the array; MFR=Mean firing rate; MBR=Mean bursting rate; BD=Burst duration; MFIB=Mean firing intra burst; sp=spikes; s=seconds; min=minute; ms=millisecond
