# Supplementary material for: Lack of Epileptogenic Effects of the Creatine Precursor Guanidinoacetic Acid on Neuronal Cultures In Vitro
Source: MDPI journal article supplement (doi:10.3390/biom13010074), 2022-12-30
Supplement: s1 [file s1]

SUPPLEMENTAL TABLE 2: Mean bursting rate (MBR) of single networks - Measurement unit: bursts/min

NEOCORTICAL NETWORKS

| Internal code number of network | Concentration of guanidinoacetic acid (GAA) | Baseline | 1 $\mu$ M | 10 $\mu$ M | 100 $\mu$ M |
|---------------------------------|---------------------------------------------|----------|-----------|------------|-------------|
| 15345                           |                                             | 4,74     | 3,44      | 2,97       | 0,57        |
| 18331                           |                                             | 11,4     | 11,77     | 11,23      | 6,39        |
| 18332                           |                                             | 7,54     | 6,59      | 6,85       | 3,8         |
| 19216                           |                                             | 3,46     | 4,41      | 2,09       | 1,2         |
| 20551                           |                                             | 2,06     | 1,86      | 1,73       | 0,4         |
| 20559                           |                                             | 7,66     | 5,44      | 1,81       | 0,19        |
| 22643                           |                                             | 1,83     | 1,03      | 0,55       | 0           |
| 20554                           |                                             | 2,49     | 1,74      | 0,71       | 0           |

HIPPOCAMPAL NETWORKS

| Internal code number of network | Concentration of guanidinoacetic acid (GAA) | Baseline | 1 $\mu$ M | 10 $\mu$ M | 100 $\mu$ M |
|---------------------------------|---------------------------------------------|----------|-----------|------------|-------------|
| 24250                           |                                             | 8,05     | 5,89      | 0,29       | 0           |
| 20554                           |                                             | 16,31    | 12,65     | 8,34       | 0,83        |
| 20512                           |                                             | 26,11    | 38,88     | 31,96      | 10,25       |
| 18333                           |                                             | 15,68    | 17,91     | 3,06       | 6,36        |
| 18332                           |                                             | 10,01    | 9,76      | 9,88       | 5,67        |
| 18331                           |                                             | 17,18    | 18,36     | 23,95      | 19,16       |
| 15345                           |                                             | 25,15    | 15,1      | 2,4        | 0           |
